# Supplementary material for: Vertically Resolved Global Ocean Light Models Using Machine Learning
Source: MDPI journal article supplement (doi:10.3390/rs15245663), 2023-12-07
Supplement: s1 [file s1]

## **Contents of this file**

Figures S1 – S9

## **Introduction**

This document includes:

- Geographical locations of all BGC-Argo profiles used for the development and validation of the SOCA-light model for ED380 (Figure S1)
- Geographical locations of all BGC-Argo profiles used for the development and validation of the SOCA-light model for ED412 (Figure S2)
- Geographical locations of all BGC-Argo profiles used for the development and validation of the SOCA-light model for ED490 (Figure S3)
- Scatter plots of all the four light variables (PAR, ED380, ED412 and ED490) retrieved by SOCA-light models versus float measured from NASTG (Figure S4)
- Vertical sections of light variables (PAR, ED380, ED412, and ED490) measured and modelled from EMS (Figure S5)
- Scatter plots of all the four light variables (PAR, ED380, ED412 and ED490) retrieved by SOCA-light models versus float measured from EMS (Figure S6)
- Scatter plots of all the four light variables (PAR, ED380, ED412 and ED490) retrieved by SOCA-light models versus float measured from SO (Figure S7)
- Vertical sections of light variables (PAR, ED380, ED412, and ED490) measured and modelled from NASPG (Figure S8)
- Scatter plots of all the four light variables (PAR, ED380, ED412 and ED490) retrieved by SOCA-light models versus float measured from NASPG (Figure S9)

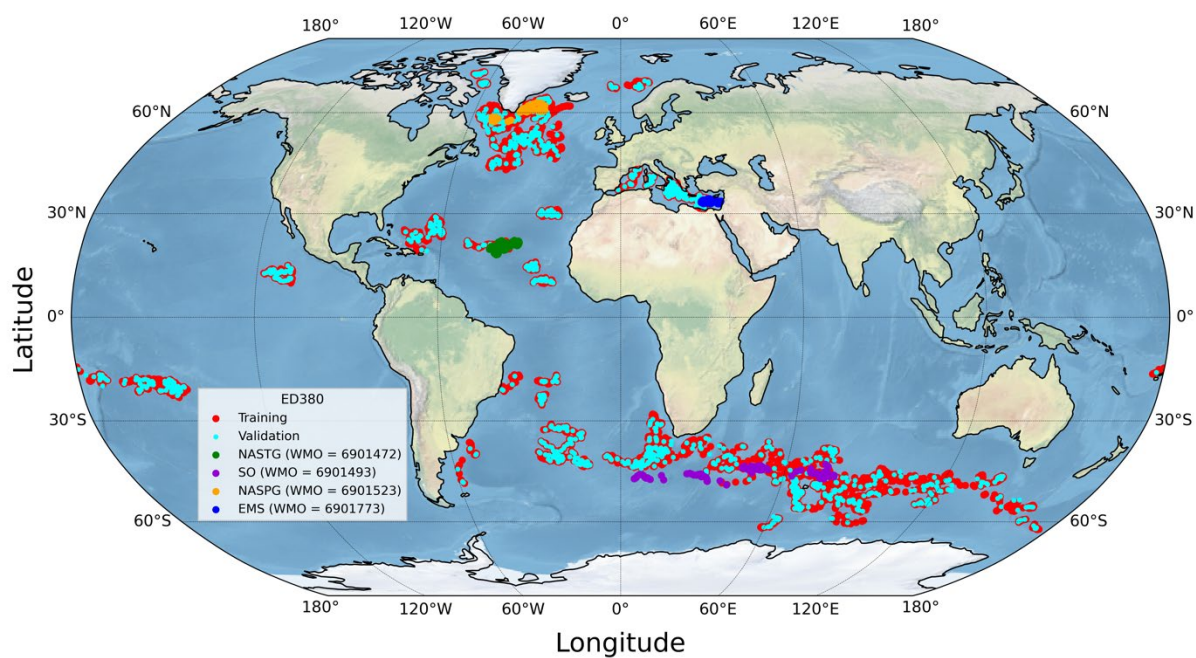

Figure S1. Geographical distribution of BGC-Argo profiles used for the development and validation of the SOCA-light model for ED380.

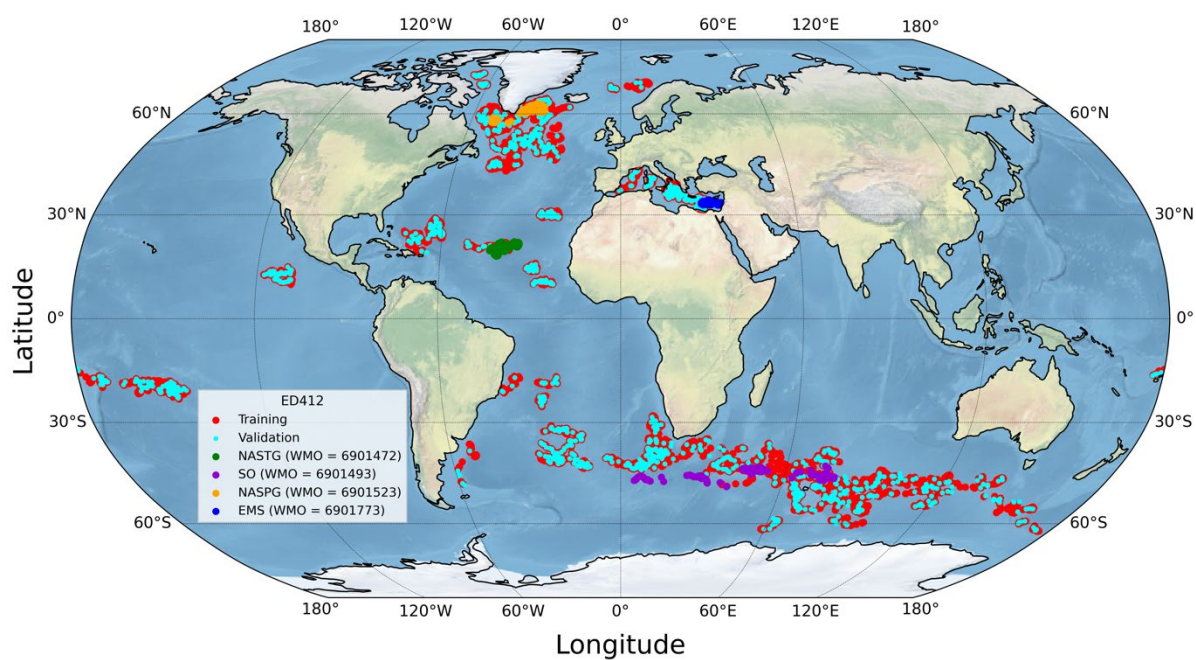

Figure S2. Geographical distribution of BGC-Argo profiles used for the development and validation of the SOCA-light model for ED412.

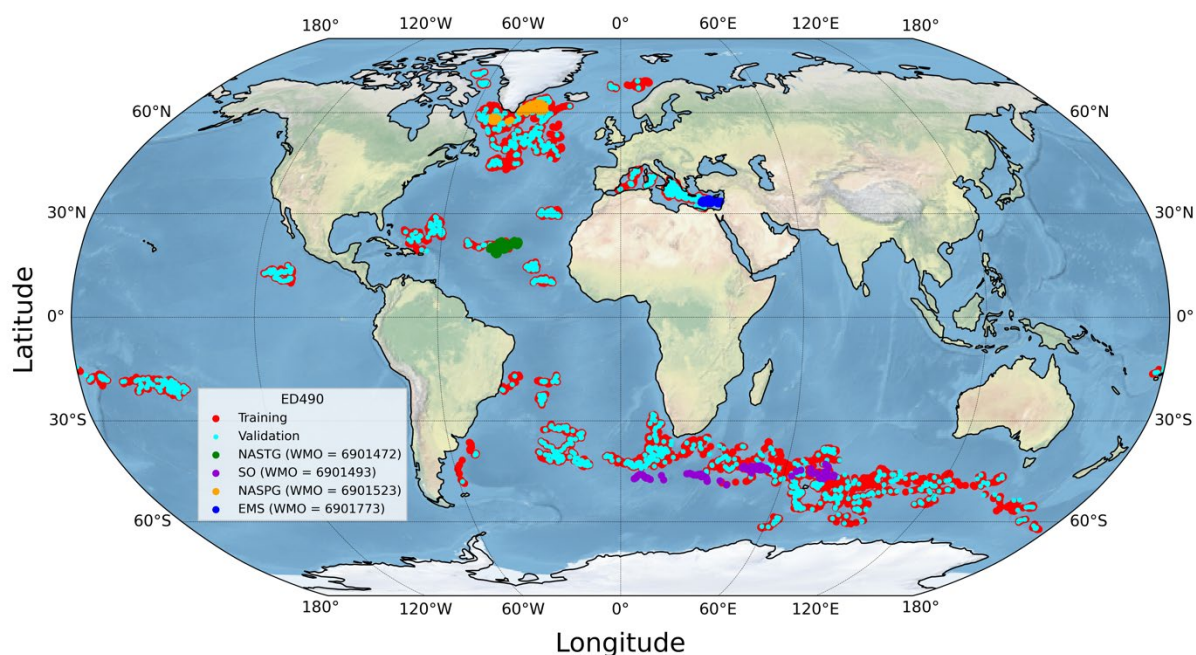

Figure S3. Geographical distribution of BGC-Argo profiles used for the development and validation of the SOCA-light model for ED490.

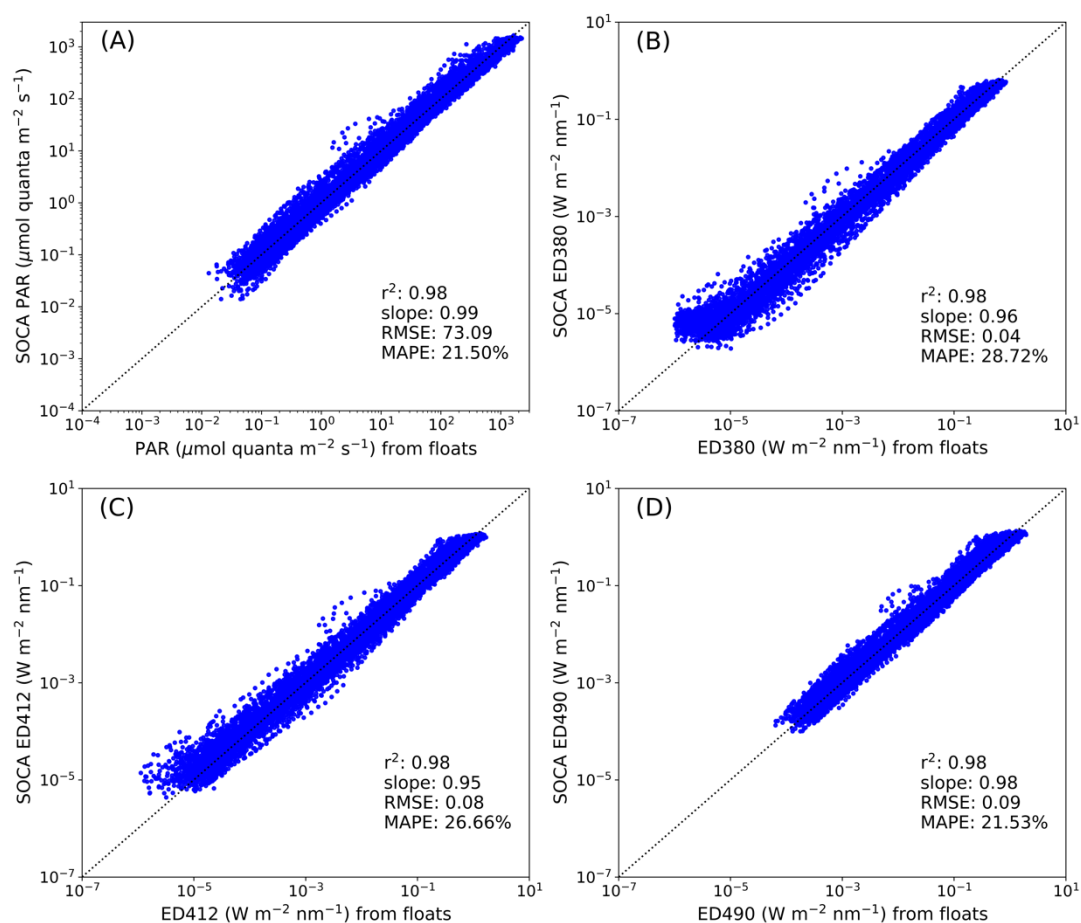

Figure S4. Scatter-plots between light variables (PAR, ED380, ED412, and ED490) modeled by SOCA light models versus their corresponding BGC-Argo measurements from NASTG. PAR (A); ED380 (B); ED412 (C); ED490 (D).



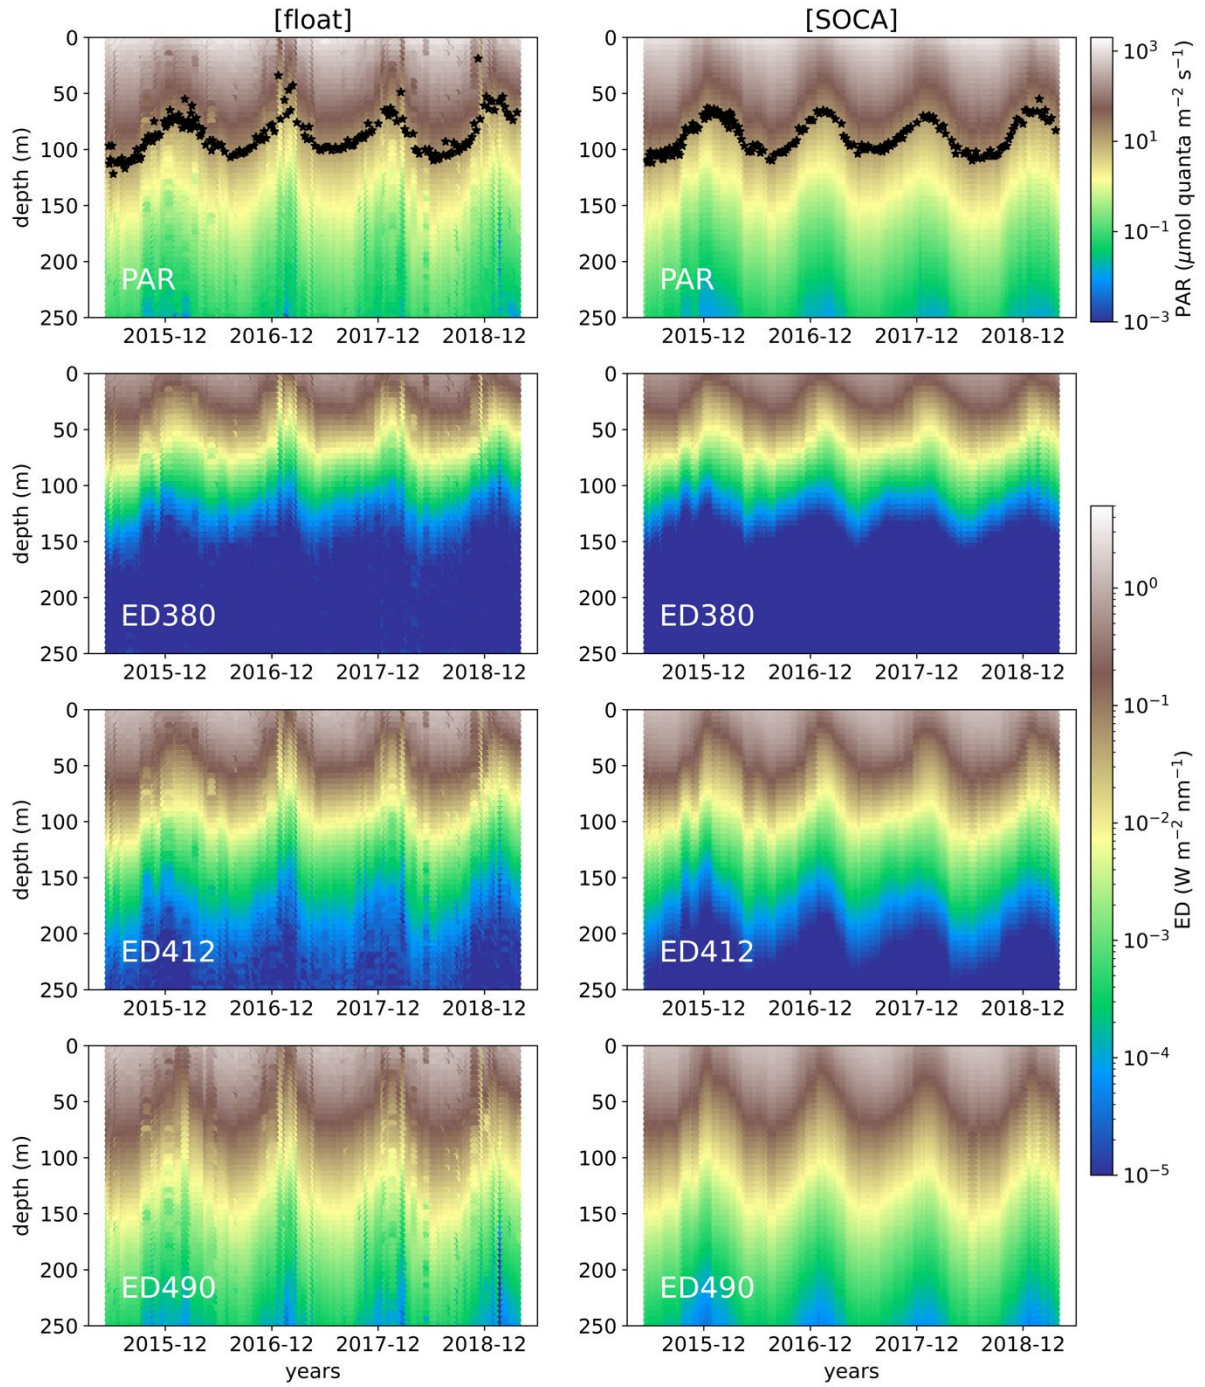

Figure S5. Time series of the vertical distribution of the four light variables in the Eastern Mediterranean Sea (EMS) measured by BGC-Argo float WMO 6901773 (left column) and modeled by SOCA-light (right column). The variables in each subplot are indicated by text in the corresponding subplots. The black stars indicate the depth at which instantaneous PAR value =  $15 \mu\text{mol quanta m}^{-2} \text{s}^{-1}$ .

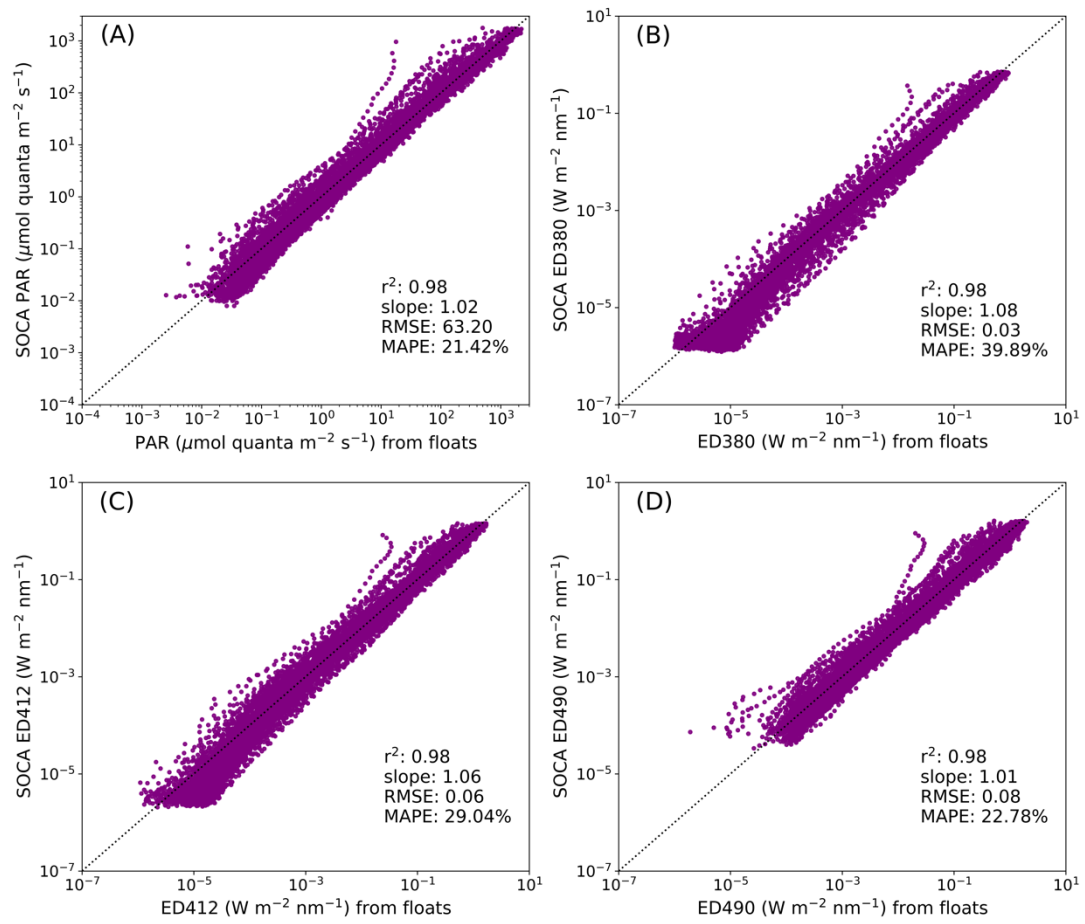

Figure S6. Scatter-plots between light variables (PAR, ED380, ED412, and ED490) modeled by SOCA light models versus their corresponding BGC-Argo measurements from EMS. PAR (A); ED380 (B); ED412 (C); ED490 (D).

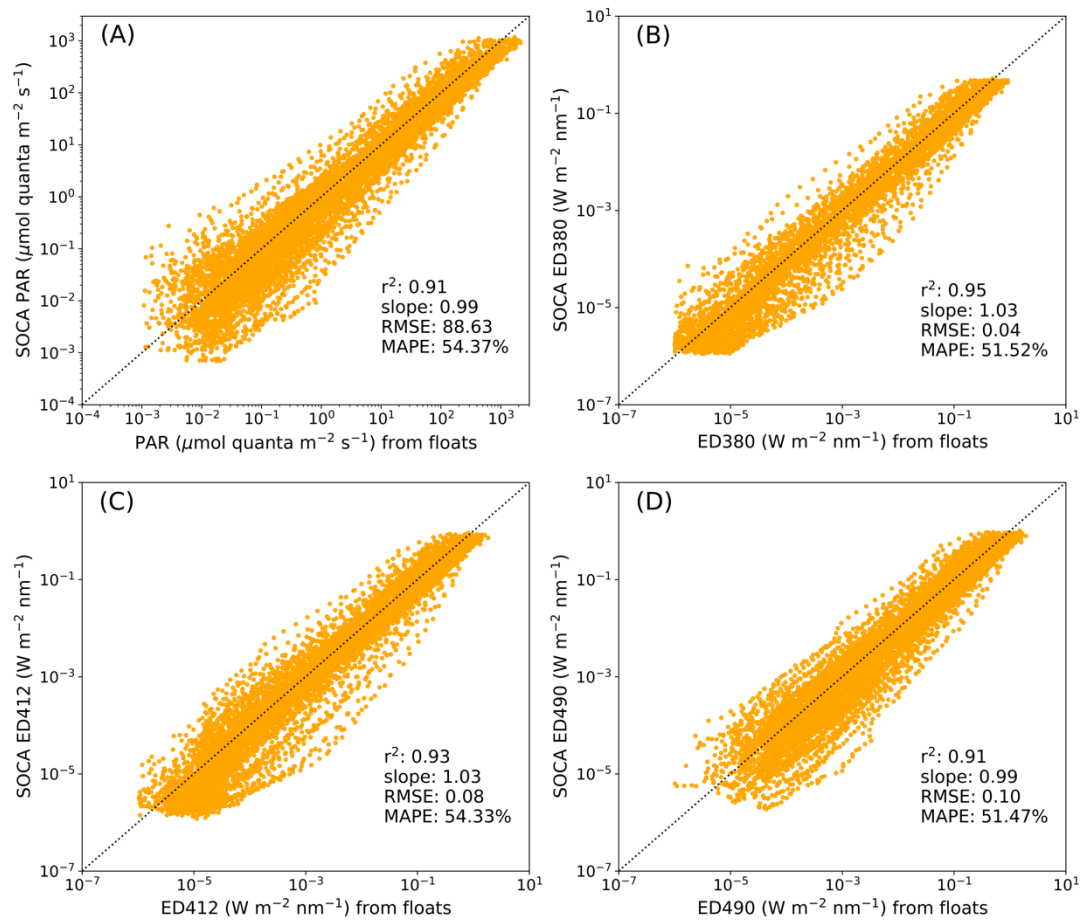

Figure S7. Scatter-plots between light variables (PAR, ED380, ED412, and ED490) modeled by SOCA light models versus their corresponding BGC-Argo measurements from SO. PAR (A); ED380 (B); ED412 (C); ED490 (D).

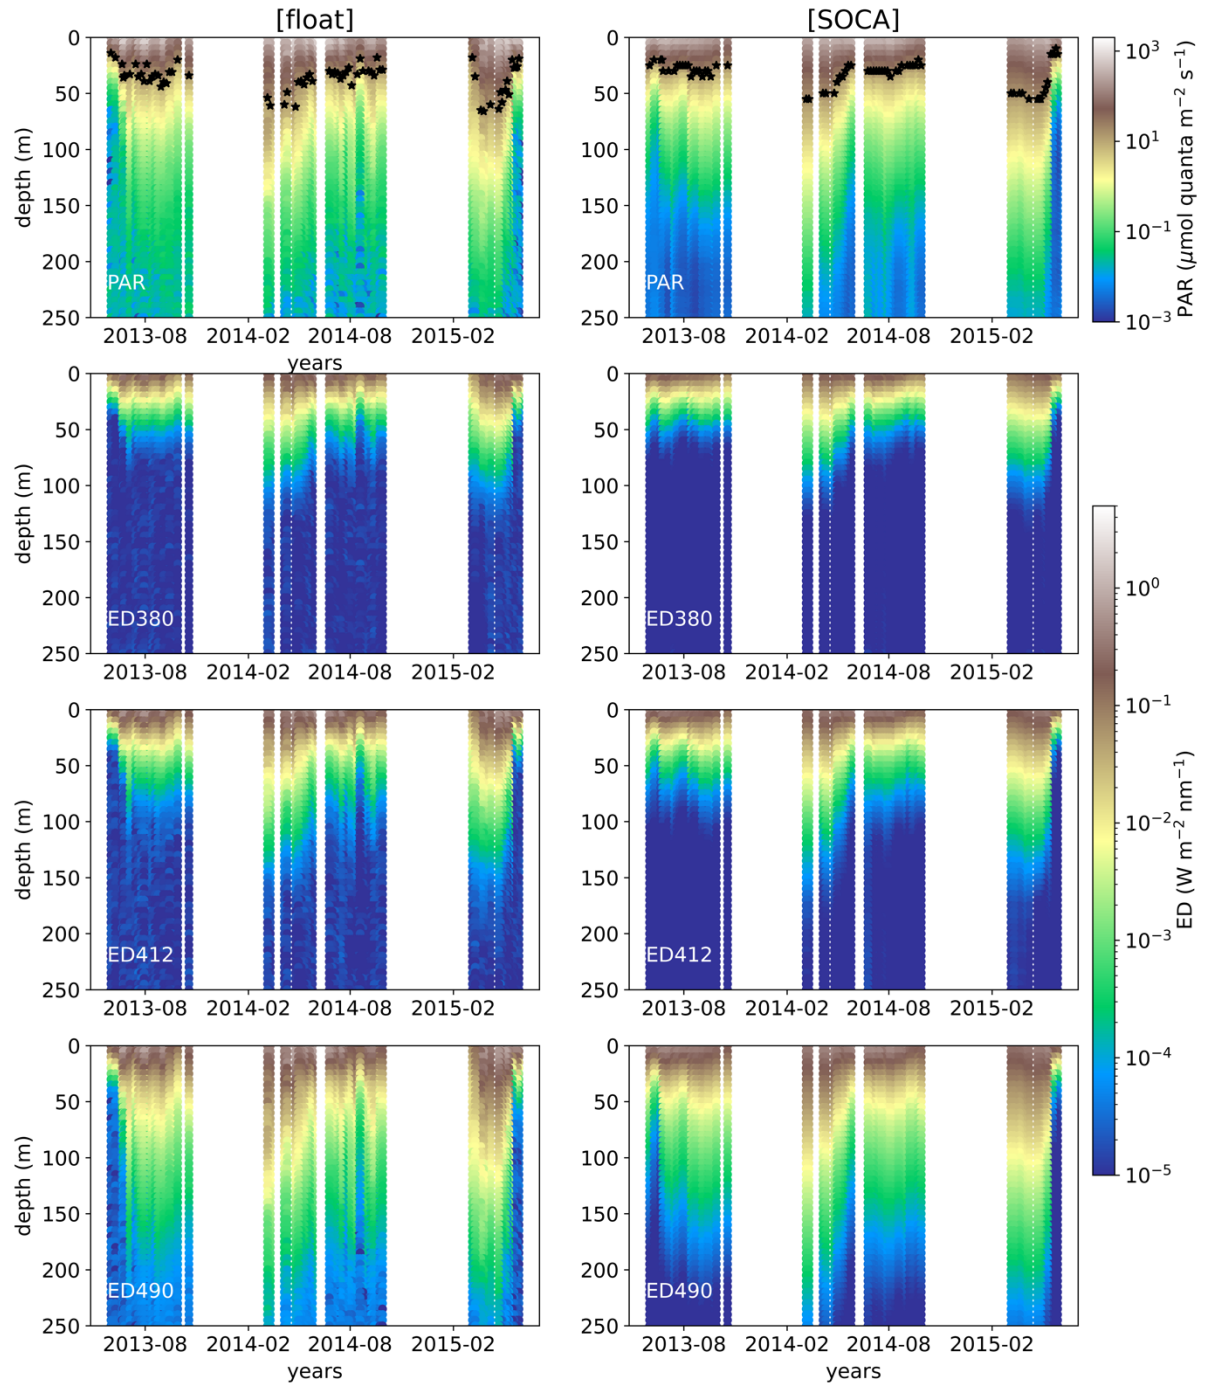

Figure S8. Time series of the vertical distribution of the four light variables in the North Atlantic Subpolar Gyre (NASPG) measured by BGC-Argo float WMO 6901523 (left column) and modeled by SOCA-light (right column). The variables in each subplot are specified by text in the corresponding subplots. The black stars indicate the depth at which instantaneous PAR value =  $15 \mu\text{mol quanta m}^{-2} \text{s}^{-1}$ .

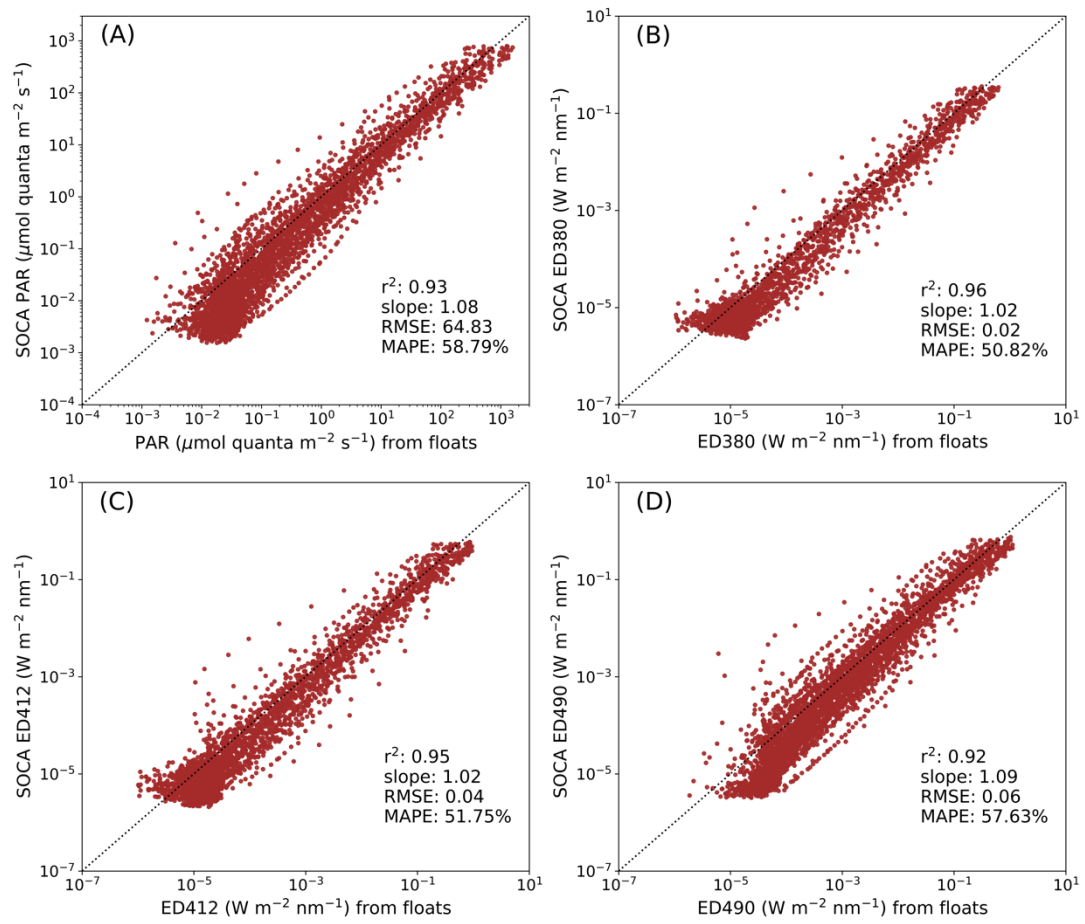

Figure S9. Scatter-plots between light variables (PAR, ED380, ED412, and ED490) modeled by SOCA light models versus their corresponding BGC-Argo measurements from NASPG. PAR (A); ED380 (B); ED412 (C); ED490 (D).
